# Supplementary material
Source: PubMed Central journal article supplement (PMC3023377)

**A**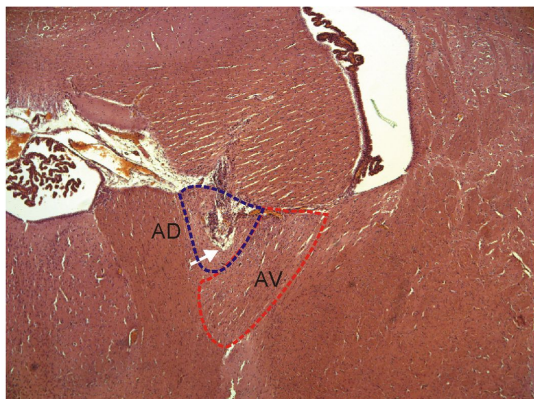**B**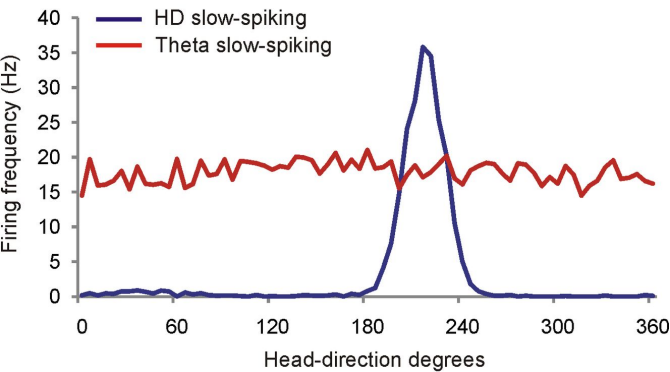**C**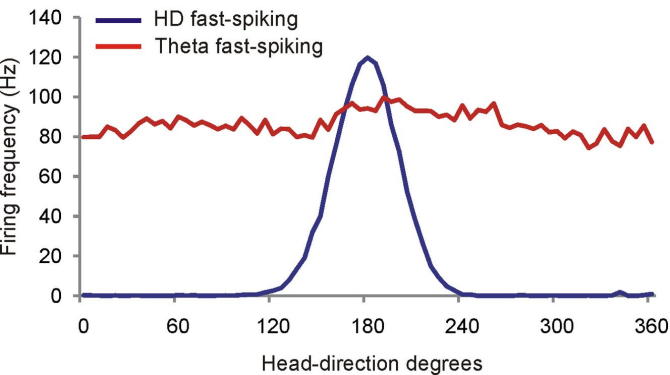

Supplement: supp_00771.2010_figS1.pdf [file supp_00771.2010_figS1.pdf]
